# Supplementary material for: Superlubricity of molybdenum disulfide subjected to large compressive strains
Source: Springer Nature journal article supplement (doi:10.1007/s40544-020-0418-8), 2021-01-08
Supplement: 40544_2020_418_MOESM1_ESM.pdf [file 40544_2020_418_MOESM1_ESM.pdf]

## Electronic Supplementary Material

# Superlubricity of molybdenum disulfide subjected to large compressive strains

Shengcong WU, Zhisen MENG, Xiaoma TAO, Zhao WANG\*

Guangxi Key Laboratory for Relativistic Astrophysics, Department of Physics, Guangxi University, Nanning 530004, China

Supporting information to <https://doi.org/10.1007/s40544-020-0418-8>

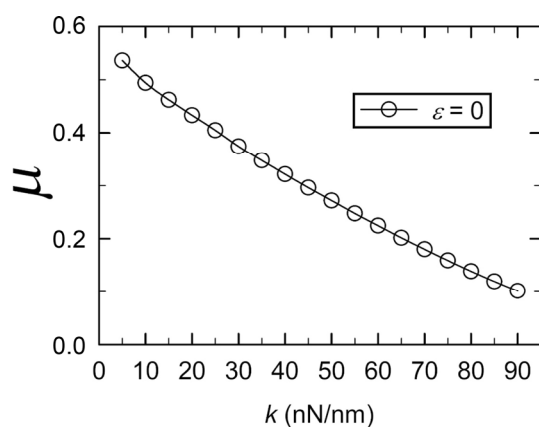

**Fig. S1** Coefficient of friction vs rigidity constant of the springs without applied strain.

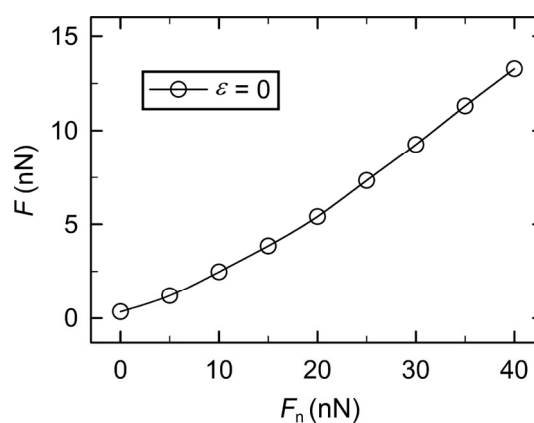

**Fig. S2** Friction force vs normal load without applied strain.

\* Corresponding author: Zhao WANG, E-mail: [zw@gxu.edu.cn](mailto:zw@gxu.edu.cn)
